# Supplementary material for: Optimization of Ciprofloxacin Adsorption on Clinoptilolite-Based Adsorbents Using Response Surface Methodology
Source: MDPI journal article supplement (doi:10.3390/nano13040740), 2023-02-15
Supplement: s1 [file s1]

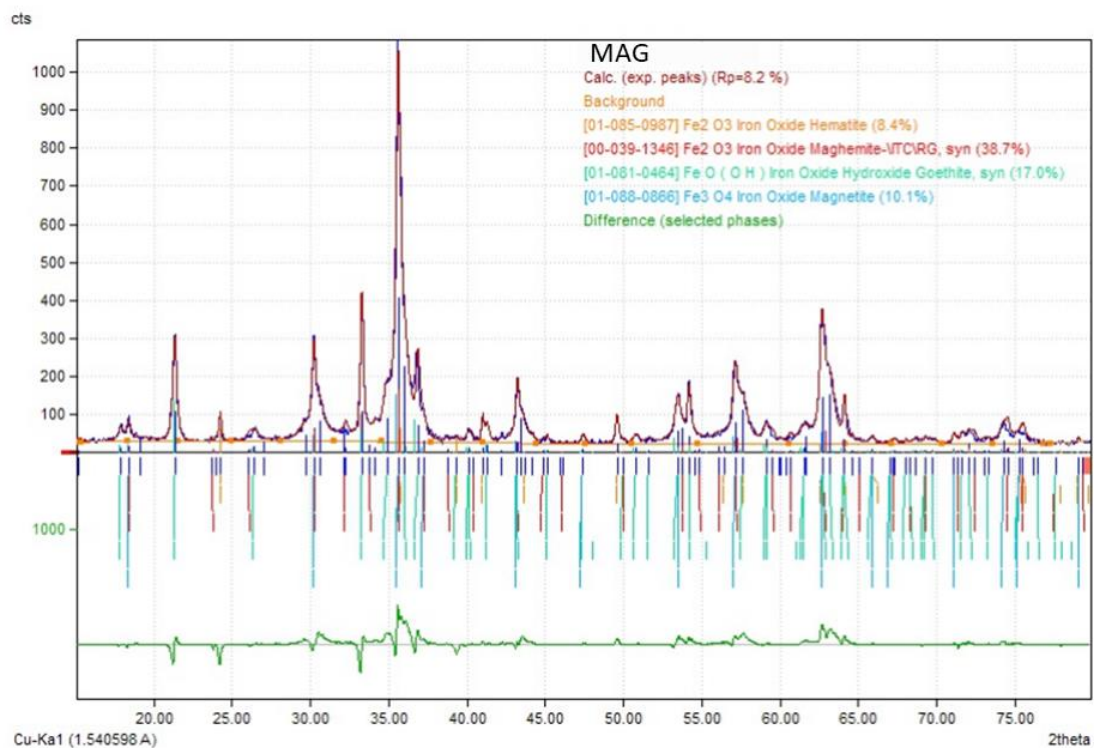

**Figure S1.** Diffraction pattern of MAG sample.

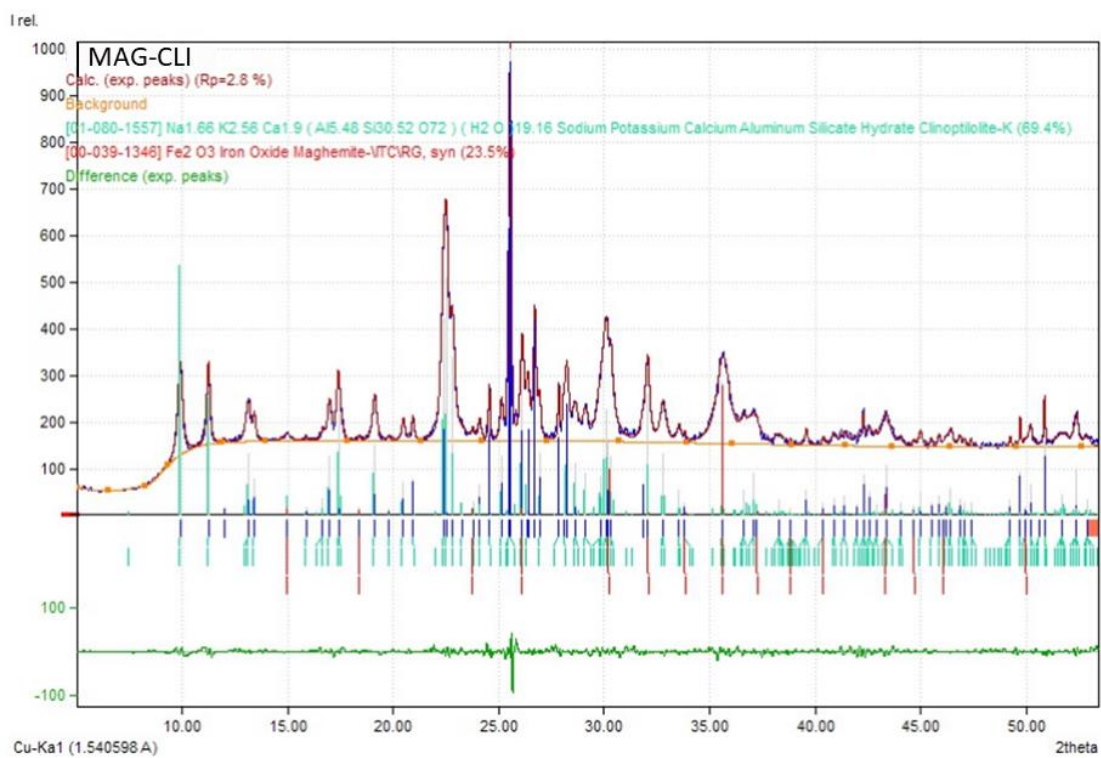

**Figure S2.** Diffraction pattern of MAG-CLI sample.

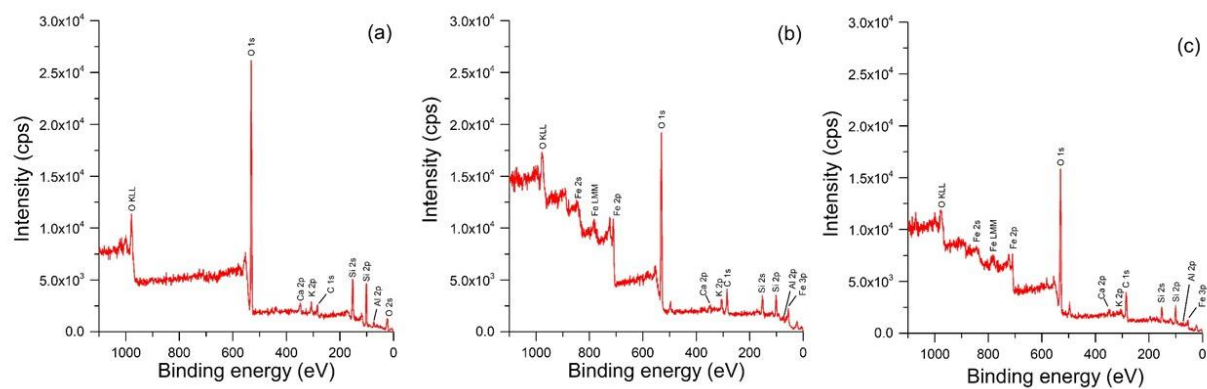

**Figure S3.** XPS survey spectra from the surface of (a) CLI, (b) MAG-CLI and (c) GO-MAG-CLI.

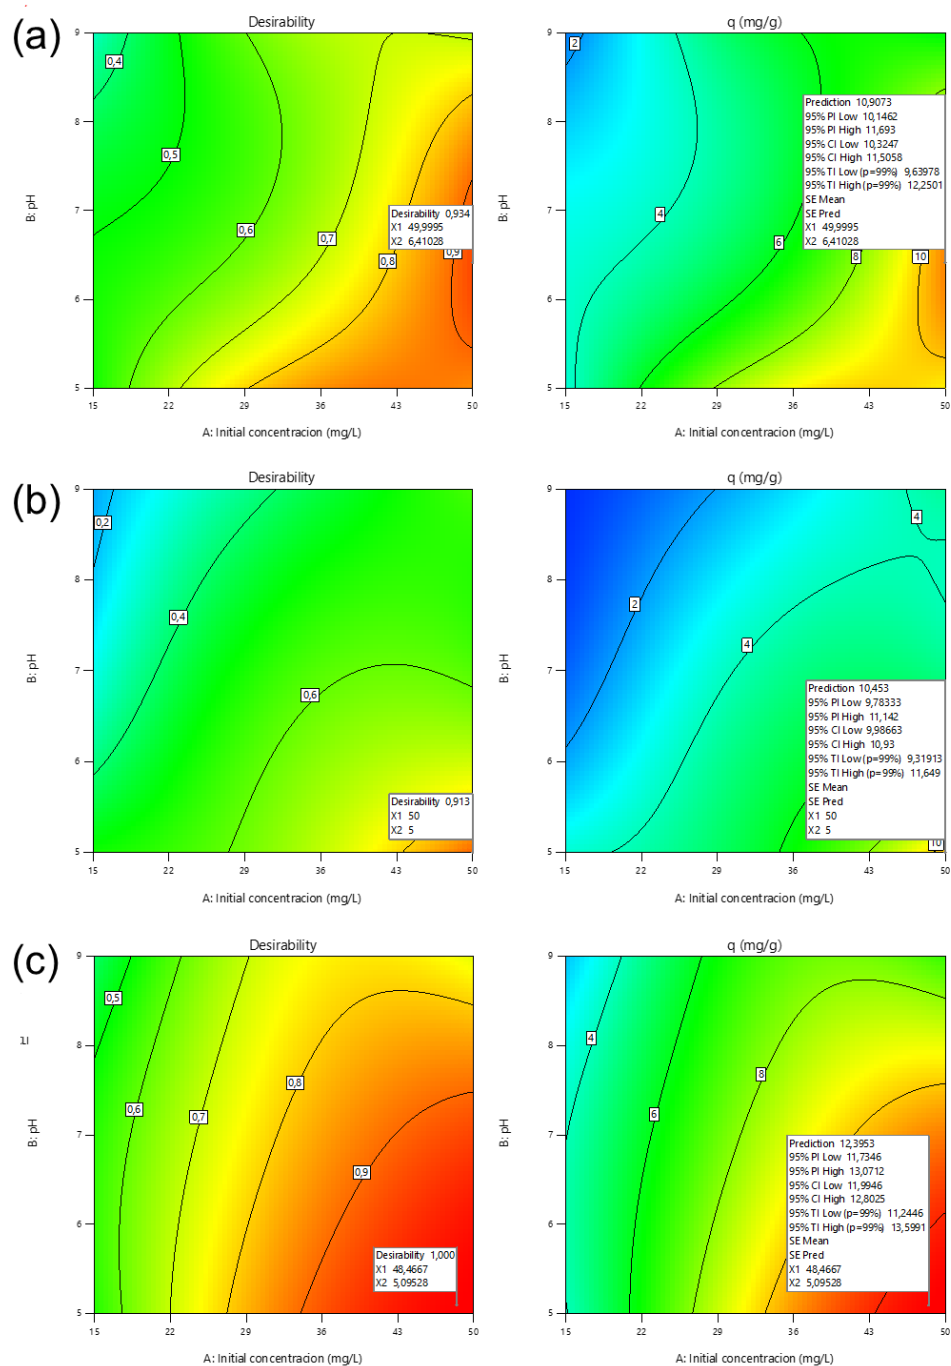

**Figure S4.** Contour diagrams for (a) CLI, (b) MAG-CLI, and (c) GO-MAG-CLI adsorption capacity optimization.

**Table S1.** The ANOVA results of the model.

| Source                          | Sum of squares | df | Mean square | F-value  | p-value  | Importance      |
|---------------------------------|----------------|----|-------------|----------|----------|-----------------|
| <b>Model</b>                    | 43.95          | 53 | 0.8293      | 596.73   | < 0.0001 | significant     |
| A-Initial concentration         | 18.56          | 1  | 18.56       | 13351.50 | < 0.0001 |                 |
| B-pH                            | 10.89          | 1  | 10.89       | 7836.64  | < 0.0001 |                 |
| C-Temperature                   | 0.0007         | 1  | 0.0007      | 0.5325   | 0.4703   |                 |
| D-Contact time                  | 0.2781         | 1  | 0.2781      | 200.10   | < 0.0001 |                 |
| E-Adsorbent                     | 6.97           | 2  | 3.48        | 2506.08  | < 0.0001 |                 |
| AB                              | 0.1302         | 1  | 0.1302      | 93.72    | < 0.0001 |                 |
| AD                              | 0.0165         | 1  | 0.0165      | 11.84    | 0.0015   |                 |
| AE                              | 0.2206         | 2  | 0.1103      | 79.37    | < 0.0001 |                 |
| BC                              | 0.0553         | 1  | 0.0553      | 39.78    | < 0.0001 |                 |
| BE                              | 1.71           | 2  | 0.8528      | 613.63   | < 0.0001 |                 |
| CE                              | 2.11           | 2  | 1.05        | 758.14   | < 0.0001 |                 |
| DE                              | 0.0698         | 2  | 0.0349      | 25.10    | < 0.0001 |                 |
| B <sup>2</sup>                  | 0.0107         | 1  | 0.0107      | 7.67     | 0.0088   |                 |
| C <sup>2</sup>                  | 0.0097         | 1  | 0.0097      | 7.00     | 0.0120   |                 |
| D <sup>2</sup>                  | 0.0078         | 1  | 0.0078      | 5.62     | 0.0233   |                 |
| ABC                             | 0.0108         | 1  | 0.0108      | 7.74     | 0.0085   |                 |
| ABE                             | 0.1039         | 2  | 0.0519      | 37.38    | < 0.0001 |                 |
| ACE                             | 0.3642         | 2  | 0.1821      | 131.04   | < 0.0001 |                 |
| ADE                             | 0.0137         | 2  | 0.0068      | 4.92     | 0.0129   |                 |
| BCD                             | 0.0094         | 1  | 0.0094      | 6.80     | 0.0132   |                 |
| BCE                             | 1.28           | 2  | 0.6383      | 459.31   | < 0.0001 |                 |
| CDE                             | 0.0091         | 2  | 0.0045      | 3.27     | 0.0494   |                 |
| A <sup>2</sup> B                | 0.0347         | 1  | 0.0347      | 24.97    | < 0.0001 |                 |
| A <sup>2</sup> C                | 0.0787         | 1  | 0.0787      | 56.60    | < 0.0001 |                 |
| A <sup>2</sup> E                | 0.0765         | 2  | 0.0382      | 27.51    | < 0.0001 |                 |
| B <sup>2</sup> E                | 0.0603         | 2  | 0.0302      | 21.70    | < 0.0001 |                 |
| C <sup>2</sup> E                | 0.0532         | 2  | 0.0266      | 19.14    | < 0.0001 |                 |
| ABCE                            | 0.0567         | 2  | 0.0283      | 20.39    | < 0.0001 |                 |
| A <sup>2</sup> B <sup>2</sup>   | 0.0390         | 1  | 0.0390      | 28.06    | < 0.0001 |                 |
| A <sup>2</sup> BE               | 0.0325         | 2  | 0.0162      | 11.68    | 0.0001   |                 |
| A <sup>2</sup> CE               | 0.0921         | 2  | 0.0461      | 33.15    | < 0.0001 |                 |
| AB <sup>2</sup> E               | 0.0680         | 2  | 0.0340      | 24.48    | < 0.0001 |                 |
| ABCDE                           | 0.0141         | 2  | 0.0071      | 5.09     | 0.0113   |                 |
| A <sup>2</sup> B <sup>2</sup> E | 0.3640         | 2  | 0.1820      | 130.97   | < 0.0001 |                 |
| <b>Residual</b>                 | 0.0500         | 36 | 0.0014      |          |          | not significant |
| Lack of Fit                     | 0.0297         | 21 | 0.0014      | 1.04     | 0.4770   |                 |
| Pure Error                      | 0.0203         | 15 | 0.0014      |          |          |                 |
| <b>Cor Total</b>                | 44.00          | 89 |             |          |          |                 |
